# Supplementary material for: Endocrinological Aspects of Avian Ergotism
Source: Royal Society of Chemistry journal article supplement (doi:10.1039/d4ra00744a), 2005-01-01
Supplement: d4ra00744a1.pdf [file d4ra00744a1.pdf]

## Investigation of the cooperative-effects of Lewis- and Brønstedt acids in homogeneously catalyzed OME fuel synthesis by inline-NMR monitoring

-

### Supporting Information

Patrick Endres,<sup>a,b</sup> Timo Schuett,<sup>a,b</sup> Stefan Zechel,<sup>a,b</sup> Martin D. Hager,<sup>a,b,c,d</sup> Robert Geitner\*<sup>e</sup> and  
Ulrich S. Schubert\*<sup>a,b,c,d</sup>

- 
- a Patrick Endres, Timo Schuett, Julian Kimmig, Dr. Stefan Zechel, Dr. Martin D. Hager, Prof. Dr. Ulrich S. Schubert  
Laboratory of Organic and Macromolecular Chemistry (IOMC),  
Friedrich Schiller University Jena,  
Humboldtstr. 10, 07743 Jena, Germany
- b Patrick Endres, Timo Schuett, Julian Kimmig, Dr. Stefan Zechel, Dr. Martin D. Hager, Prof. Dr. Ulrich S. Schubert  
Jena Center for Soft Matter (JCSM),  
Friedrich Schiller University Jena,  
Philosophenweg 7,  
07743 Jena, Germany
- c Dr. Martin D. Hager, Prof. Dr. Ulrich S. Schubert  
Center for Energy and Environmental Chemistry Jena (CEEC Jena),  
Friedrich Schiller University Jena,  
Philosophenweg 7a, 07743 Jena, Germany  
E-mail: ulrich.schubert@uni-jena.de
- d Dr. Martin D. Hager, Prof. Dr. Ulrich S. Schubert  
Helmholtz Insitute for Polymers in Energy Applications Jena (HIPOLE Jena),  
Lessingstraße 12-14, 07743 Jena, Germany
- e Jun.-Prof. Dr. Robert Geitner  
Institute for Chemistry and Bioengineering  
Technical University Ilmenau  
Weimarer Str. 32, 98693 Ilmenau, Germany  
E-mail: robert.geitner@tu-ilmenau.de

### Table of contents

|                                                |    |
|------------------------------------------------|----|
| 1. NMR measurement cycle                       | S1 |
| 2. NMR measurements at selected reaction times | S2 |
| 3. Kinetic fitting of molar share over time    | S3 |

## 1. NMR measurement cycle

The NMR measurements were started with an initial shim on sample, and then  $^1\text{H}$  NMR spectra were acquired. This process was repeated ten times before conducting another shim on sample. This entire cycle of measurements and shimming was repeated up to a maximum of 50 times. (Fig. S1)

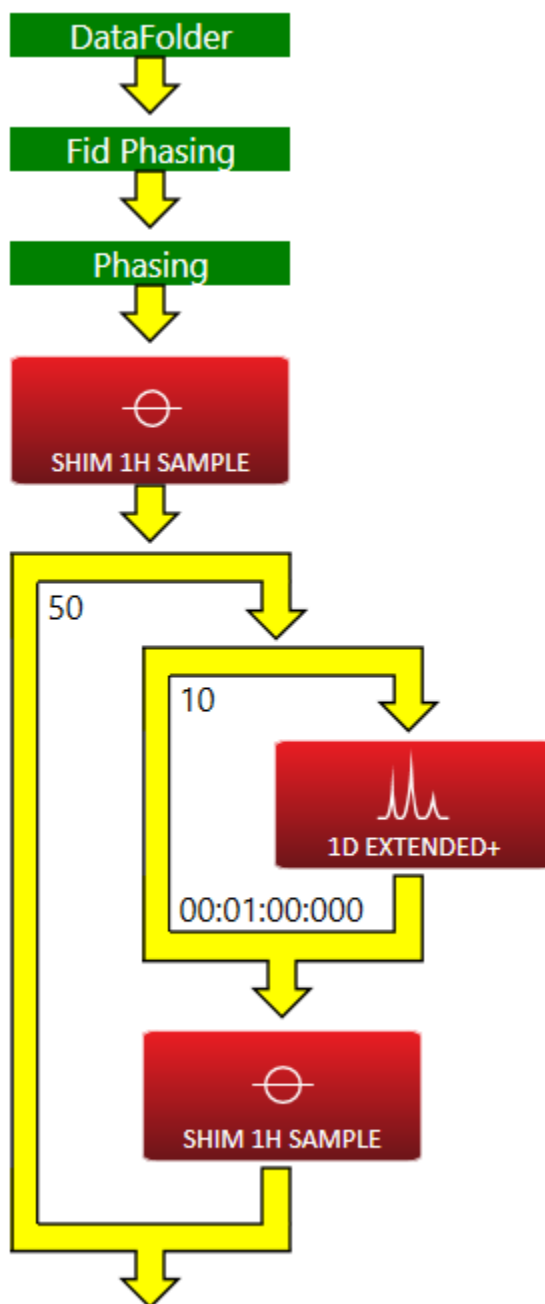

**Figure S1:** Analytic cycle of the online NMR measurements.

## 2. $^1\text{H}$ NMR measurements at selected reaction times

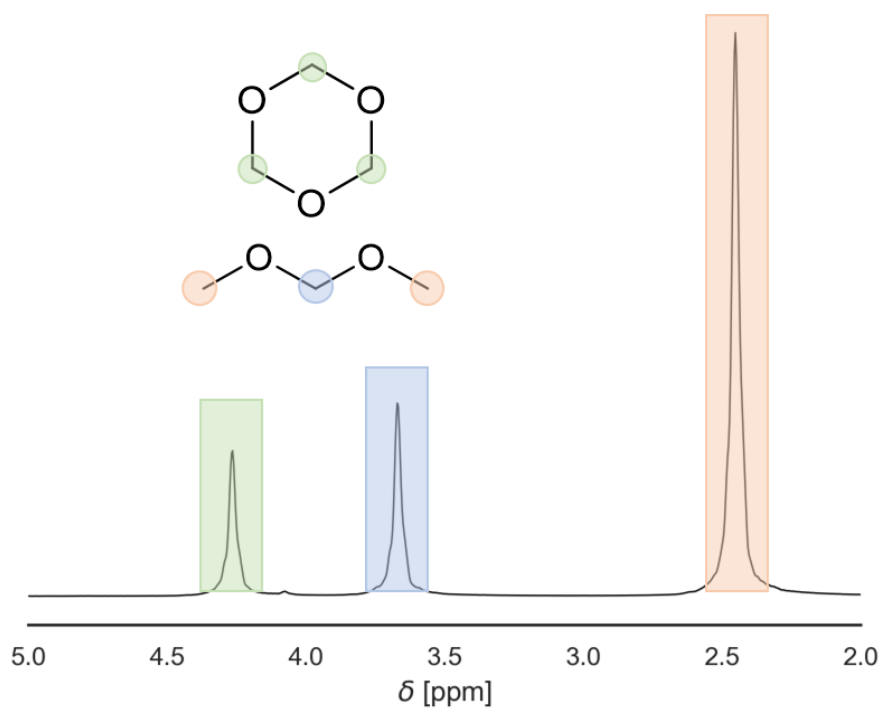

**Figure S2:**  $^1\text{H}$  NMR spectrum after reactor loading, dimethoxy methane 150 g, trioxane 44.4 g,  $\text{ZnCl}_2$  17.5 mmol  $\text{L}^{-1}$ , 20 °C (43 MHz).

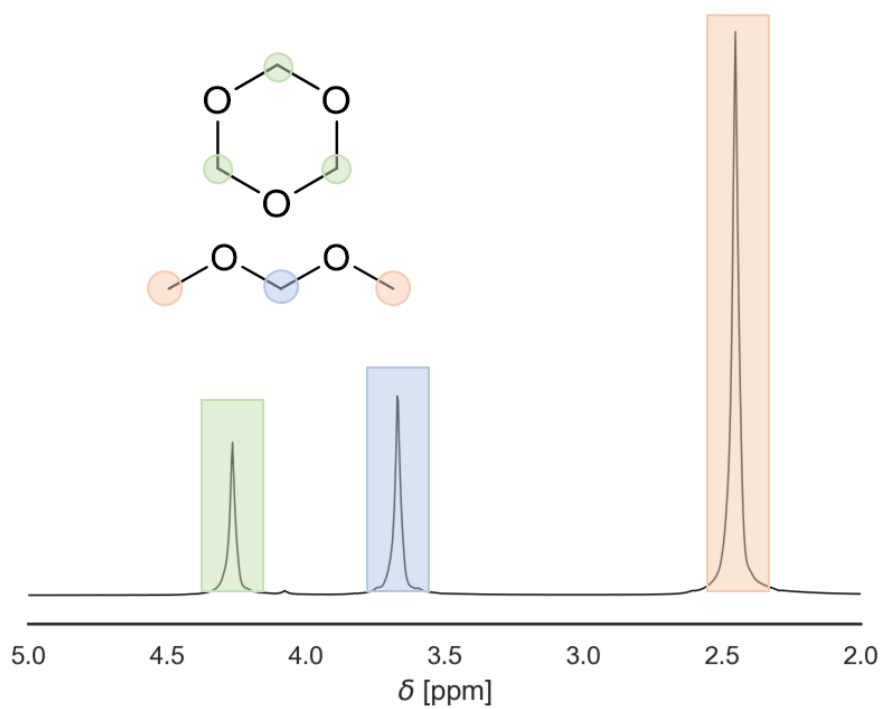

**Figure 3:**  $^1\text{H}$  NMR spectrum after 20 min prior to the addition of the Brønsted acid catalyst, dimethoxy methane 150 g, trioxane 44.4 g,  $\text{ZnCl}_2$  17.5 mmol  $\text{L}^{-1}$ , 20 °C (43 MHz).

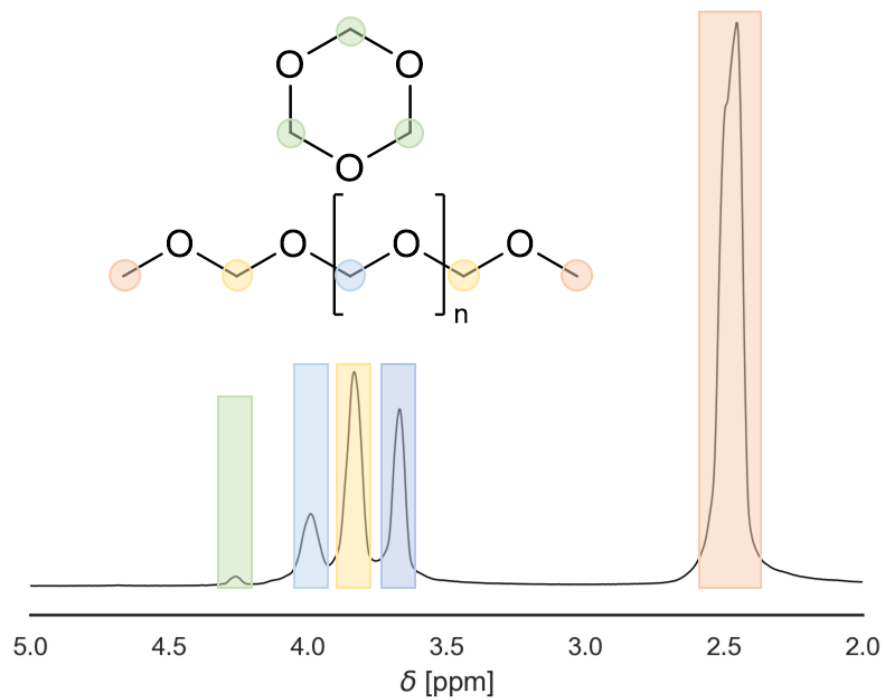

**Figure 4:**  $^1\text{H}$  NMR spectrum after 120 min at equilibrium conditions, dimethoxy methane 150 g, trioxane 44.4 g, triflic acid  $13.5 \text{ mmol L}^{-1}$ ,  $\text{ZnCl}_2$   $17.5 \text{ mmol L}^{-1}$ ,  $20^\circ\text{C}$  (43 MHz).

### 3. Kinetic fitting of molar share over time

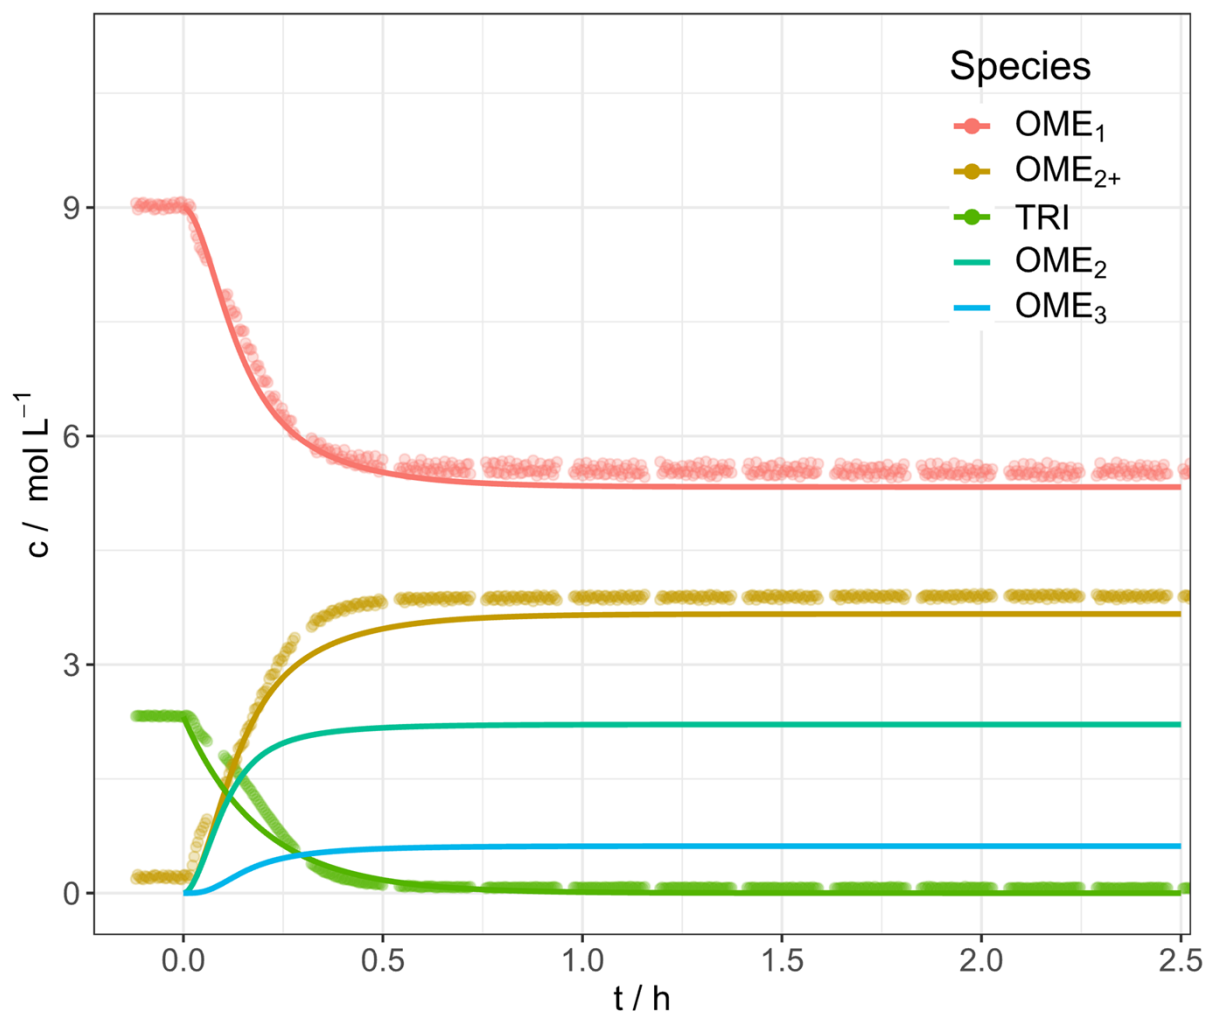

**Figure 6:** Experimentally extracted concentrations of OME<sub>x</sub> over time with kinetic fits, dimethoxy methane 150 g, trioxane 44.4 g, triflic acid 13.5 mmol L<sup>-1</sup>, ZnCl<sub>2</sub> 2.9 mmol L<sup>-1</sup>, 20 °C.
